# Supplementary material for: Application of an iron-based porphyrinic metal–organic framework for removal of warfarin from aqueous solutions
Source: Royal Society of Chemistry journal article supplement (doi:10.1039/c9ay01769k), 2019-12-18
Supplement: c9ay01769k1.pdf [file c9ay01769k1.pdf]

*Electronic Supplementary Information to:*

**Application of an iron-based porphyrinic metal-  
organic framework for removal of warfarin from  
aqueous solutions**

Zahra Safaei Moghaddam<sup>a</sup>, Massoud Kaykhaii<sup>a\*</sup>, Mostafa Khajeh<sup>b</sup> and Ali

Reza Oveisi<sup>b</sup>

<sup>a</sup>*Department of Chemistry, Faculty of Sciences, University of Sistan and*

*Baluchestan, Zahedan 98135-674, Iran. Tel: +98(54)33446413*

<sup>b</sup>*Department of Chemistry, Faculty of Sciences, University of Zabol, Zabol,*

*Iran*

---

\*Corresponding author, Email: [kaykhaii@chem.usb.ac.ir](mailto:kaykhaii@chem.usb.ac.ir); Fax +98(54)33446888

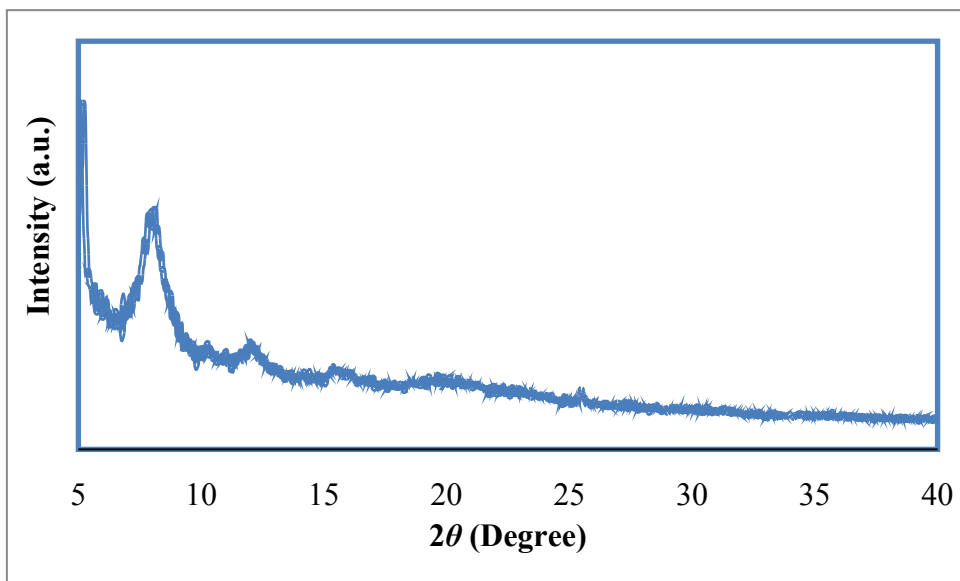

**Fig. S1.** PXRD pattern of synthesized PCN-600(Fe) MOF.

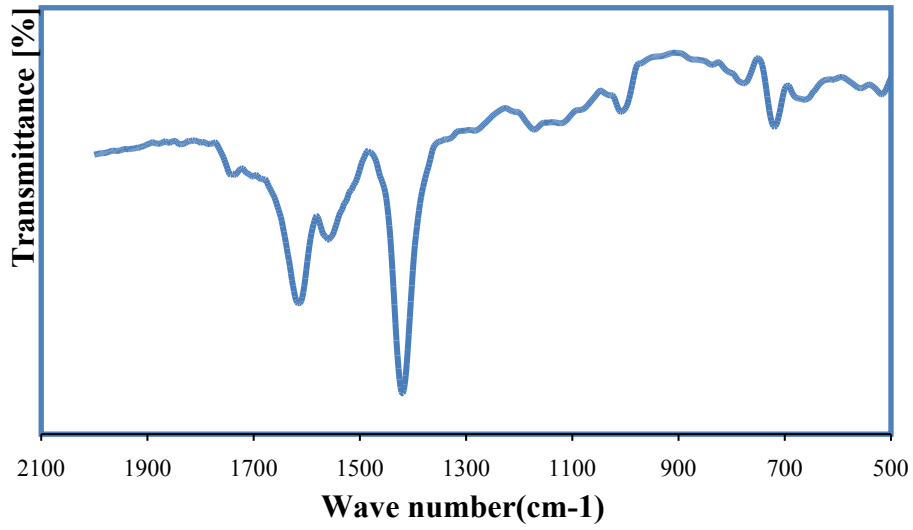

**Fig. S2.** FT-IR spectrum of PCN-600(Fe) MOF.
